# Supplementary material for: Unprecedented boat-shaped [Mo2O5(IO3)4]2− polyanions induced a strong second harmonic generation response
Source: Royal Society of Chemistry journal article supplement (doi:10.1039/d2cc00134a), 2022-01-01
Supplement: d2cc00134a1.pdf [file d2cc00134a1.pdf]

Electronic Supporting Information

**Unprecedented boat-shaped  $[\text{Mo}_2\text{O}_5(\text{IO}_3)_4]^{2-}$  polyanions induced  
strong second harmonic generation response †**

Wei Zeng,<sup>a</sup> Xuehua Dong,<sup>a</sup> Yao Tian,<sup>a</sup> Ling Huang,<sup>b</sup> Hongmei Zeng,<sup>a</sup> Zhien Lin,<sup>\*a</sup>  
and Guohong Zou<sup>\*a</sup>

<sup>a</sup>College of Chemistry, Sichuan University, Chengdu 610065, P. R. China

<sup>b</sup>College of Chemistry and Materials Science, Sichuan Normal University, Chengdu 610066, P. R.  
China

## Table of contents

| Sections    | Titles                                                                                                                                                                       | Pages  |
|-------------|------------------------------------------------------------------------------------------------------------------------------------------------------------------------------|--------|
| Sections S1 | Experimental section (Instrumentations and Computational Descriptions).                                                                                                      | S3-S5  |
| Table S1    | Crystal data and structure refinement for GMIO.                                                                                                                              | S6     |
| Table S2    | Atomic coordinates and equivalent isotropic displacement parameters for GMIO.                                                                                                | S7     |
| Table S3    | Selected Bond lengths (Å) and angles (deg) for GMIO.                                                                                                                         | S8     |
| Table S4    | Calculation of dipole moment for IO <sub>3</sub> , MoO <sub>6</sub> , C(NH <sub>2</sub> ) <sub>3</sub> polyhedra and net dipole moment for a unit cell in GMIO (D = Debyes). | S9-S10 |
| Table S5    | Structures, Band gaps and SHG intensities of existing NCS molybdenum (VI) iodate (V).                                                                                        | S11    |
| Fig. S1     | boat-shaped [Mo <sub>2</sub> O <sub>5</sub> (IO <sub>3</sub> ) <sub>4</sub> ] <sup>2-</sup> polyanion.                                                                       | S12    |
| Fig. S2     | Illustration of the 3D structure of GMIO viewed down the a-axis. Green arrows indicate the direction of the dipole moments.                                                  | S12    |
| Fig. S3     | Experimental and calculated XRD patterns for GMIO.                                                                                                                           | S13    |
| Fig. S4     | TGA analysis of GMIO under N <sub>2</sub> atmosphere.                                                                                                                        | S13    |
| Fig. S5     | The IR spectrum of GMIO.                                                                                                                                                     | S13    |
| Fig. S6     | Calculated band structures for GMIO.                                                                                                                                         | S14    |
| References  |                                                                                                                                                                              | S15    |

## Section S1. Experimental Section

### Synthesis.

The starting material  $[\text{C}(\text{NH}_2)_3]_2\text{CO}_3$  (99%, Aladdin),  $\text{HIO}_3$  (99.5%, MACKLIN) and  $\text{MoO}_3$  (99.5%, MACKLIN) were commercially available with analytical grade and used without further processing.

$[\text{C}(\text{NH}_2)_3]_2\text{CO}_3$  (0.090 g, 0.5 mmol),  $\text{HIO}_3$  (0.352 g, 2 mmol) and  $\text{MoO}_3$  (0.072 g, 0.5 mmol) were sealed in a 23 mL Teflon-lined steel autoclave with  $\text{H}_2\text{O}$  (2 mL) and then heated at 85 °C for 4 days. The autoclave was cooled to room temperature with the rate of 6 °C/h, colorless plate crystals of  $[\text{C}(\text{NH}_2)_3]_2\text{Mo}_2\text{O}_5(\text{IO}_3)_4 \cdot 2\text{H}_2\text{O}$  (GMIO) were obtained in ~78% yield (based on Mo).

### Instrumentations.

#### Single crystal X-ray diffraction.

The diffraction data of GMIO was measured on a Rigaku XtaLAB Synergy R diffractometer with Mo  $K\alpha$  ( $\lambda = 0.71073\text{\AA}$ ) radiation at 293(2) K. The structure was solved and refined on  $F^2$  using the SHELX-2015 program package.<sup>1,2</sup> All of the structures were verified using the the program PLATON and no higher symmetries were found.<sup>3</sup> Crystallographic data and structural refinements for GMIO are summarized in Table S1. Crystallographic data details are listed in Tables S2-S3 in the ESI†, respectively.

#### Powder XRD diffraction.

In order to confirm the phase purity of GMIO, powder XRD patterns was obtained using a Rigaku Smartlab powder X-ray diffractometer with Cu  $K\alpha$  radiation ( $\lambda = 1.54056\text{\AA}$ ), in the angular range of  $2\theta = 5\text{-}50^\circ$  (step width:  $0.02^\circ$ ).

#### Thermal analysis.

Netzsch STA 409 PC thermal analyzer, with a heating rate of 10 °C /min and in the range of RT-800 °C under  $\text{N}_2$  atmosphere was used to measure the thermal behavior of GMIO.

#### IR Spectroscopy.

IR spectrum of GMIO was obtained on a Vertex 70 Fourier transform infrared (FT-IR) spectrometer by using KBr pellets, with transmission mode from 4000 to 400  $\text{cm}^{-1}$ . The power samples containing 100 mg of dry KBr and 1 mg of cleaned crystals were compressed into tablets

and measured.

### UV-vis-NIR Diffuse Reflectance Spectroscopy.

UV-vis-NIR diffuse reflectance spectrum of GMIO was recorded by using PerkinElmer Lambda-950 UV/VIS/NIR spectrophotometer at room temperature. The Kubelka-Munk function<sup>4,5</sup> is used to calculate the absorption spectrum from the reflection spectrum:  $F(R) = \alpha/S = (1-R)^2/2R$ , where  $R$  is the reflectance,  $\alpha$  is the absorption coefficient, and  $S$  is the scattering coefficient.

### Second-Harmonic Generation Tests.

A Q-switched Nd: YAG laser was used to measure the SHG signals of GMIO and KDP under 1064 nm radiation based on Kurtz-Perry method.<sup>6</sup> Crystalline GMIO and KDP were ground and sieved into the following particle size: 25-45, 45-58, 58-75, 75-106, 106-150, and 150-212  $\mu\text{m}$  owing to that the SHG efficiency mainly depends on the particle size.

### Computational Descriptions.

The first-principles calculations were carried out on GMIO by using the CASTEP.<sup>7</sup> The gradient-corrected functional (GGA) with Perdew-Burke-Ernzer (PBE) was used for all the calculations.<sup>8</sup> All the atoms were performed by Norm-conserving pseudopotentials (NCP), with C  $2s^22p^2$ , N  $2s^22p^3$ , Mo  $4d^55s^1$ , I  $4d^{10}5s^25p^5$ , O  $2s^22p^4$  treated as valence electrons.<sup>9</sup> The kinetic energy cutoff of 750 eV and the k-point sampling of  $1 \times 2 \times 3$  were chosen for the GMIO.<sup>10</sup> All other parameter settings are CASTEP default values.

To obtain the linear optical properties, the complex dielectric function  $\varepsilon(\omega) = \varepsilon_1(\omega) + i\varepsilon_2(\omega)$  has been determined in the random phase approximation from the PBE wavefunctions. The imaginary part of the dielectric function due to direct inter-band transitions is given by the expression,

$$\varepsilon_2(\hbar\omega) = \frac{2e^2\pi}{\Omega\varepsilon_0} \sum_{k,v,c} \left| \langle \psi_k^c | u \cdot r | \psi_k^v \rangle \right|^2 \delta(E_k^c - E_k^v - E)$$

where  $\Omega$ ,  $\omega$ ,  $u$ ,  $v$  and  $c$  are the unit-cell volume, photon frequencies, the vector defining the polarization of the incident electric field, valence and conduction bands, respectively. The real part of the dielectric function is obtained from  $\varepsilon_2$  by a Kramers-Kronig transformation,

$$\varepsilon_1(\omega) = 1 + \left(\frac{2}{\pi}\right) \int_0^{+\infty} d\omega' \frac{\omega'^2 \varepsilon_2(\omega')}{\omega'^2 - \omega^2}$$

In calculation of the static  $\chi^{(2)}$  coefficients, the so-called length-gauge formalism derived by

Aversa and Sipe <sup>11</sup> and modified by Rashkeev *et al* <sup>12</sup> is adopted, which has been proved to be successful in calculating the second order susceptibility for semiconductors and insulators. <sup>13, 14</sup> In the static case, the imaginary part of the static second-order optical susceptibility can be expressed as:

$$\begin{aligned} \chi^{abc} &= \frac{e^3}{\hbar^2 \Omega} \sum_{nml,k} \frac{r_{nm}^a (r_{ml}^b r_{ln}^c + r_{ml}^c r_{ln}^b)}{2\omega_{nm} \omega_{ml} \omega_{ln}} [\omega_n f_{ml} + \omega_m f_{ln} + \omega_l f_{nm}] \\ &+ \frac{ie^3}{4\hbar^2 \Omega} \sum_{nm,k} \frac{f_{nm}}{\omega_{mn}^2} [r_{nm}^a (r_{mn;c}^b + r_{mn;b}^c) + r_{nm}^b (r_{mn;c}^a + r_{mn;a}^c) + r_{nm}^c (r_{mn;b}^a + r_{mn;a}^b)] \end{aligned}$$

where  $r$  is the position operator,  $\hbar\omega_{nm} = \hbar\omega_n - \hbar\omega_m$  is the energy difference for the bands  $m$  and  $n$ ,  $f_{mn} = f_m - f_n$  is the difference of the Fermi distribution functions, subscripts  $a$ ,  $b$ , and  $c$  are Cartesian indices, and  $r_{mn;a}^b$  is the so-called generalized derivative of the coordinate operator in  $k$  space,

$$r_{nm;a}^b = \frac{r_{nm}^a \Delta_{mn}^b + r_{nm}^b \Delta_{mn}^a}{\omega_{nm}} + \frac{i}{\omega_{nm}} \times \sum_l (\omega_{lm} r_{nl}^a r_{lm}^b - \omega_{nl} r_{nl}^b r_{lm}^a)$$

where  $\Delta_{nm}^a = (p_{nm}^a - p_{mm}^a) / m$  is the difference between the electronic velocities at the bands  $n$  and  $m$ .

**Table S1.** Crystal data and structure refinement for GMIO.

| <b>Compound</b>                                                                                                 | <b>[C(NH<sub>2</sub>)<sub>3</sub>]<sub>2</sub>Mo<sub>2</sub>O<sub>5</sub>(IO<sub>3</sub>)<sub>4</sub>·2H<sub>2</sub>O</b> |
|-----------------------------------------------------------------------------------------------------------------|---------------------------------------------------------------------------------------------------------------------------|
| <b>Formula Mass</b>                                                                                             | 1126.68                                                                                                                   |
| <b>Crystal System</b>                                                                                           | orthorhombic                                                                                                              |
| <b>Space Group</b>                                                                                              | <i>Pna</i> 2 <sub>1</sub>                                                                                                 |
| <b><i>a</i> (Å)</b>                                                                                             | 23.8979 (5)                                                                                                               |
| <b><i>b</i> (Å)</b>                                                                                             | 13.1994 (3)                                                                                                               |
| <b><i>c</i> (Å)</b>                                                                                             | 7.8514 (2)                                                                                                                |
| <b><i>α</i> (Å)</b>                                                                                             | 90                                                                                                                        |
| <b><i>β</i> (Å)</b>                                                                                             | 90                                                                                                                        |
| <b><i>γ</i> (Å)</b>                                                                                             | 90                                                                                                                        |
| <b><i>V</i>(Å<sup>3</sup>)</b>                                                                                  | 2476.63 (10)                                                                                                              |
| <b><i>Z</i></b>                                                                                                 | 4                                                                                                                         |
| <b><i>ρ</i>(calcd) (g/cm<sup>3</sup>)</b>                                                                       | 3.022                                                                                                                     |
| <b>Temperature (K)</b>                                                                                          | 293 (2)                                                                                                                   |
| <b><i>λ</i> (Å)</b>                                                                                             | 0.71073                                                                                                                   |
| <b><i>F</i>(000)</b>                                                                                            | 2068.0                                                                                                                    |
| <b><i>μ</i> (mm<sup>-1</sup>)</b>                                                                               | 6.087                                                                                                                     |
| <b>Final <i>R</i> indices (<i>I</i>&gt;2σ(<i>I</i>))<sup>a</sup> <i>R</i><sub>1</sub>/<i>wR</i><sub>2</sub></b> | 0.0314/0.0882                                                                                                             |
| <b>GOF on <i>F</i><sup>2</sup></b>                                                                              | 1.083                                                                                                                     |
| <b>Flack factor</b>                                                                                             | 0.06 (3)                                                                                                                  |

$${}^a R_1(F) = \frac{\sum \|F_o - |F_c|\|}{\sum F_o}, \quad wR_2(F_o^2) = \left[ \frac{\sum w(F_o^2 - F_c^2)^2}{\sum w(F_o^2)^2} \right]^{1/2}$$

**Table S2.** Atomic coordinates and equivalent isotropic displacement parameters for GMIO.  $U_{\text{(eq)}}$  is defined as one third of the trace of the orthogonalized  $U_{ij}$  tensor.

| atom | x           | y           | z            | $U_{\text{eq}} (\text{\AA}^2)$ |
|------|-------------|-------------|--------------|--------------------------------|
| I1   | 0.71556 (2) | 0.49881 (4) | 0.48843 (7)  | 0.02004 (13)                   |
| I2   | 0.71402 (2) | 0.76550 (4) | 0.72593 (7)  | 0.01682 (13)                   |
| I3   | 0.69495 (2) | 0.76610 (4) | 0.23365 (8)  | 0.01833 (13)                   |
| I4   | 0.71854 (2) | 1.03055 (4) | 0.47929 (8)  | 0.02188 (14)                   |
| Mo1  | 0.59125 (3) | 0.62824 (6) | 0.52477 (12) | 0.02436 (19)                   |
| Mo2  | 0.59286 (3) | 0.90888 (6) | 0.52292 (12) | 0.02286 (18)                   |
| N1   | 0.6447 (10) | 0.2397 (16) | 0.822 (5)    | 0.184 (17)                     |
| N1   | 0.6447 (10) | 0.2397 (16) | 0.822 (5)    | 0.184 (17)                     |
| N2   | 0.5562 (6)  | 0.1940 (12) | 0.754 (3)    | 0.097 (7)                      |
| N3   | 0.5748 (6)  | 0.3584 (9)  | 0.808 (2)    | 0.087 (6)                      |
| N4   | 0.6294 (7)  | 0.2588 (11) | 0.247 (4)    | 0.116 (10)                     |
| N5   | 0.5401 (6)  | 0.1971 (14) | 0.257 (3)    | 0.130 (11)                     |
| N6   | 0.5563 (5)  | 0.3607 (10) | 0.339 (2)    | 0.085 (5)                      |
| O1   | 0.7290 (4)  | 0.4079 (7)  | 0.6498 (11)  | 0.041 (2)                      |
| O2   | 0.7164 (3)  | 0.4200 (6)  | 0.3008 (10)  | 0.0341 (18)                    |
| O3   | 0.6384 (3)  | 0.4971 (4)  | 0.5115 (10)  | 0.0245 (14)                    |
| O4   | 0.5571 (3)  | 0.5919 (6)  | 0.7029 (12)  | 0.044 (2)                      |
| O5   | 0.5467 (3)  | 0.5928 (6)  | 0.3695 (13)  | 0.044 (2)                      |
| O6   | 0.6654 (3)  | 0.6623 (5)  | 0.6871 (8)   | 0.0235 (14)                    |
| O7   | 0.7510 (3)  | 0.7652 (5)  | 0.5257 (10)  | 0.0264 (14)                    |
| O8   | 0.6672 (3)  | 0.8737 (5)  | 0.6850 (8)   | 0.0227 (14)                    |
| O9   | 0.6559 (3)  | 0.6601 (5)  | 0.3224 (9)   | 0.0246 (14)                    |
| O10  | 0.6622 (4)  | 0.7660 (5)  | 0.0285 (10)  | 0.0307 (16)                    |
| O11  | 0.6568 (3)  | 0.8722 (5)  | 0.3237 (9)   | 0.0247 (15)                    |
| O12  | 0.5784 (3)  | 0.7680 (5)  | 0.5252 (12)  | 0.0305 (17)                    |
| O13  | 0.5476 (4)  | 0.9466 (7)  | 0.3707 (11)  | 0.043 (2)                      |
| O14  | 0.5603 (3)  | 0.9483 (6)  | 0.7045 (11)  | 0.0384 (18)                    |
| O15  | 0.6417 (3)  | 1.0371 (5)  | 0.5087 (9)   | 0.0267 (15)                    |
| O16  | 0.7349 (4)  | 1.1232 (6)  | 0.6358 (12)  | 0.043 (2)                      |
| O17  | 0.7212 (4)  | 1.1059 (6)  | 0.2880 (10)  | 0.0372 (19)                    |
| O18  | 0.6620 (4)  | 0.5176 (7)  | 0.9707 (13)  | 0.053 (2)                      |
| O19  | 0.8276 (4)  | 0.5121 (7)  | 0.4501 (14)  | 0.058 (3)                      |
| C1   | 0.5914 (6)  | 0.2648 (12) | 0.788 (3)    | 0.060 (5)                      |
| C2   | 0.5754 (7)  | 0.2733 (14) | 0.290 (4)    | 0.087 (8)                      |

**Table S3.** Selected Bond lengths (Å) and angles (deg) for GMIO.

|            |           |             |            |
|------------|-----------|-------------|------------|
| I2—O6      | 1.816 (7) | Mo1—O12     | 1.870 (6)  |
| I2—O8      | 1.843 (7) | Mo1—O4      | 1.688 (8)  |
| I2—O7      | 1.803 (7) | Mo1—O5      | 1.685 (8)  |
| I3—O11     | 1.814 (7) | Mo2—O8      | 2.233 (7)  |
| I3—O9      | 1.820 (7) | Mo2—O11     | 2.240 (7)  |
| I3—O10     | 1.791 (8) | Mo2—O15     | 2.058 (6)  |
| I1—O3      | 1.854 (6) | Mo2—O12     | 1.892 (6)  |
| I1—O2      | 1.803 (7) | Mo2—O14     | 1.706 (8)  |
| I1—O1      | 1.775 (8) | Mo2—O13     | 1.686 (7)  |
| I4—O15     | 1.854 (7) | N3—C1       | 1.307 (18) |
| I4—O17     | 1.803 (8) | N4—C2       | 1.35 (3)   |
| I4—O16     | 1.777 (8) | N2—C1       | 1.29 (2)   |
| Mo1—O6     | 2.229 (7) | N6—C2       | 1.30 (2)   |
| Mo1—O3     | 2.067 (6) | C2—N5       | 1.34 (2)   |
| Mo1—O9     | 2.256 (7) | N1—C1       | 1.34 (3)   |
| O6—I2—O8   | 99.4 (3)  | O15—Mo2—O8  | 75.6 (3)   |
| O7—I2—O6   | 99.5 (3)  | O15—Mo2—O11 | 75.7 (2)   |
| O7—I2—O8   | 98.4 (3)  | O12—Mo2—O8  | 86.3 (3)   |
| O11—I3—O9  | 100.8 (3) | O12—Mo2—O11 | 85.3 (3)   |
| O10—I3—O11 | 97.6 (3)  | O12—Mo2—O15 | 155.9 (3)  |
| O10—I3—O9  | 96.9 (3)  | O14—Mo2—O8  | 87.2 (3)   |
| O2—I1—O3   | 94.8 (3)  | O14—Mo2—O11 | 164.0 (3)  |
| O1—I1—O3   | 95.9 (4)  | O14—Mo2—O15 | 93.0 (3)   |
| O1—I1—O2   | 101.0 (4) | O14—Mo2—O12 | 102.0 (4)  |
| O17—I4—O15 | 96.5 (4)  | O13—Mo2—O8  | 167.1 (4)  |
| O16—I4—O15 | 95.7 (4)  | O13—Mo2—O11 | 90.4 (4)   |
| O16—I4—O17 | 100.9 (4) | O13—Mo2—O15 | 94.7 (4)   |
| O6—Mo1—O9  | 79.7 (2)  | O13—Mo2—O12 | 100.3 (4)  |
| O3—Mo1—O6  | 76.4 (2)  | O13—Mo2—O14 | 102.1 (4)  |
| O3—Mo1—O9  | 75.4 (3)  | I2—O6—Mo1   | 139.1 (4)  |
| O12—Mo1—O6 | 86.0 (3)  | I2—O8—Mo2   | 138.0 (3)  |
| O12—Mo1—O3 | 156.3 (3) | I1—O3—Mo1   | 122.5 (3)  |
| O12—Mo1—O9 | 86.0 (3)  | I3—O11—Mo2  | 141.4 (4)  |
| O4—Mo1—O6  | 88.1 (4)  | I4—O15—Mo2  | 122.0 (3)  |
| O4—Mo1—O3  | 93.9 (3)  | I3—O9—Mo1   | 139.8 (4)  |
| O4—Mo1—O9  | 165.3 (3) | Mo1—O12—Mo2 | 160.0 (4)  |
| O4—Mo1—O12 | 101.5 (4) | N6—C2—N4    | 122.4 (16) |
| O5—Mo1—O6  | 166.5 (4) | N6—C2—N5    | 120.3 (16) |
| O5—Mo1—O3  | 94.3 (3)  | N5—C2—N4    | 116.7 (18) |
| O5—Mo1—O9  | 88.6 (4)  | N3—C1—N1    | 119.8 (17) |
| O5—Mo1—O12 | 99.9 (4)  | N2—C1—N3    | 120.9 (16) |
| O5—Mo1—O4  | 102.4 (5) | N2—C1—N1    | 118.9 (17) |
| O8—Mo2—O11 | 79.1 (2)  |             |            |



**Table S4.** Calculation of dipole moment for IO<sub>3</sub>, MoO<sub>6</sub>, C(NH<sub>2</sub>)<sub>3</sub> polyhedra and net dipole moment for a unit cell in GMIO (D = Debyes).

| GMIO                        |                   |                |                |                 |
|-----------------------------|-------------------|----------------|----------------|-----------------|
| Polar unit<br>(a unit cell) | Dipole moment (D) |                |                |                 |
|                             | x-component       | y-component    | z-component    | total magnitude |
| I(1)O <sub>3</sub>          | 14.51460987       | 25.30343221    | -0.279952704   | 29.17217775     |
|                             | 14.51460987       | -25.30343221   | -0.279952704   | 29.17217775     |
|                             | -14.51460987      | -25.30343221   | -0.279952704   | 29.17217775     |
|                             | -14.51460987      | 25.30343221    | -0.279952704   | 29.17217775     |
|                             | -14.51460987      | 25.30343221    | -0.279952704   | 29.17217775     |
|                             | 14.51460987       | -25.30343221   | -0.279952704   | 29.17217775     |
| I(2)O <sub>3</sub>          | 13.99541272       | 0.030110721    | 23.43274766    | 27.29406798     |
|                             | 13.99541272       | -0.030110721   | 23.43274766    | 27.29406798     |
|                             | -13.99541272      | 0.030110721    | 23.43274766    | 27.29406798     |
|                             | -13.99541272      | -0.030110721   | 23.43274766    | 27.29406798     |
| I(3)O <sub>3</sub>          | 28.34354926       | -0.154182033   | 3.00823772     | 28.50315861     |
|                             | 28.34354926       | 0.154182033    | 3.00823772     | 28.50315861     |
|                             | -28.34354926      | -0.154182033   | 3.00823772     | 28.50315861     |
|                             | -28.34354926      | 0.154182033    | 3.00823772     | 28.50315861     |
| I(4)O <sub>3</sub>          | 13.17605882       | -25.64197061   | 0.039671955    | 28.82916503     |
|                             | -13.17605882      | 25.64197061    | 0.039671955    | 28.82916503     |
|                             | 13.17605882       | 25.64197061    | 0.039671955    | 28.82916503     |
|                             | 13.17605882       | -25.64197061   | 0.039671955    | 28.82916503     |
|                             | U <sub>x</sub>    | U <sub>y</sub> | U <sub>z</sub> | U <sub>t</sub>  |
|                             | 0                 | 0              | 104.2429131    | 104.2429131     |
| Mo(1)O <sub>6</sub>         | -3.958849121      | -1.64035744    | 0.494113367    | 4.313630363     |
|                             | -3.958849121      | 1.64035744     | 0.494113367    | 4.313630363     |
|                             | 3.958849121       | -1.64035744    | 0.494113367    | 4.313630363     |
|                             | 3.958849121       | 1.64035744     | 0.494113367    | 4.313630363     |
| Mo(2)O <sub>6</sub>         | -4.380353894      | -1.954702221   | 0.23567739     | 4.802489442     |
|                             | -4.380353894      | 1.954702221    | 0.23567739     | 4.802489442     |
|                             | 4.380353894       | 1.954702221    | 0.23567739     | 4.802489442     |
|                             | 4.380353894       | -1.954702221   | 0.23567739     | 4.802489442     |
|                             | U <sub>x</sub>    | U <sub>y</sub> | U <sub>z</sub> | U <sub>t</sub>  |
|                             | 0                 | 0              | 2.919163029    | 2.919163029     |
| C(1)N <sub>3</sub>          | -0.032278087      | 0.605897254    | -2.499453233   | 2.572045843     |
|                             | -0.032278087      | -0.605897254   | -2.499453233   | 2.572045843     |
|                             | 0.032278087       | -0.605897254   | -2.499453233   | 2.572045843     |
|                             | 0.032278087       | 0.605897254    | -2.499453233   | 2.572045843     |
| C(2)N <sub>3</sub>          | 0.394407188       | 0.311586955    | 3.251268346    | 3.289891992     |
|                             | 0.394407188       | -0.311586955   | 3.251268346    | 3.289891992     |
|                             | -0.394407188      | -0.311586955   | 3.251268346    | 3.289891992     |
|                             | -0.394407188      | 0.311586955    | 3.251268346    | 3.289891992     |

|                   | Ux                          | Uy | Uz          | Ut          |
|-------------------|-----------------------------|----|-------------|-------------|
|                   | 0                           | 0  | 3.007260454 | 3.007260454 |
| Net dipole moment | 0                           | 0  | 110.1693366 | 110.1693366 |
| Cell Volume       | 2476.63 (10) Å <sup>3</sup> |    |             |             |

**Table S5** Structures, Band gaps and SHG intensities of existing NCS molybdenum (VI) iodate (V).

| Compounds                                                                                            | Anionic structure | Band gaps                                                                         | density of IO <sub>x</sub> groups | SHG intensities              | Ref                      |                  |
|------------------------------------------------------------------------------------------------------|-------------------|-----------------------------------------------------------------------------------|-----------------------------------|------------------------------|--------------------------|------------------|
| <b>GMIO</b>                                                                                          | <b>0D anions</b>  | <b>[Mo<sub>2</sub>O<sub>5</sub>(IO<sub>3</sub>)<sub>4</sub>]<sup>2-</sup></b>     | <b>3.55 eV</b>                    | <b>6.2 × 10<sup>-3</sup></b> | <b>5 × KDP</b>           | <b>This work</b> |
| CsMoO <sub>2</sub> F <sub>3</sub> (IO <sub>2</sub> F <sub>2</sub> )                                  | 0D anions         | [MoO <sub>2</sub> F <sub>3</sub> (IO <sub>2</sub> F <sub>2</sub> )] <sup>2-</sup> | 3.43 eV                           | 4.0 × 10 <sup>-3</sup>       | 4.5 × KDP                | 15               |
| RbMoO <sub>2</sub> F <sub>3</sub> (IO <sub>2</sub> F <sub>2</sub> )                                  | 0D anions         | [MoO <sub>2</sub> F <sub>3</sub> (IO <sub>2</sub> F <sub>2</sub> )] <sup>2-</sup> | 3.77 eV                           | 4.4 × 10 <sup>-3</sup>       | 5 × KDP                  | 15               |
| Ba <sub>2</sub> [MoO <sub>3</sub> (OH)(IO <sub>3</sub> ) <sub>2</sub> ] <sub>3</sub> IO <sub>3</sub> | 0D anions         | [MoO <sub>3</sub> (OH)(IO <sub>3</sub> ) <sub>2</sub> ] <sup>3-</sup>             | 3.78 eV                           | 10.2 × 10 <sup>-3</sup>      | 8 × KDP                  | 16               |
| RE(MoO <sub>2</sub> )(IO <sub>3</sub> ) <sub>4</sub> (OH) (RE = Nd, Sm, Eu)                          | 0D anions         | [MoO <sub>2</sub> (OH)(IO <sub>3</sub> ) <sub>3</sub> ] <sup>2-</sup>             | unknown                           | 12.4 × 10 <sup>-3</sup>      | 350 × α-SiO <sub>2</sub> | 17-19            |
| LiMoO <sub>3</sub> (IO <sub>3</sub> )                                                                | 2D                | [MoO <sub>3</sub> (IO <sub>3</sub> )] <sup>-</sup> layer                          | 2.8 eV                            | 8.1 × 10 <sup>-3</sup>       | 4 × KDP                  | 20,21            |
| NH <sub>4</sub> MoO <sub>3</sub> (IO <sub>3</sub> )                                                  | 3D framework      | [MoO <sub>3</sub> (IO <sub>3</sub> )] <sup>-</sup>                                | 3.26 eV                           | 6.8 × 10 <sup>-3</sup>       | 4.7 × KDP                | 22               |
| KRb[(MoO <sub>3</sub> ) <sub>2</sub> (IO <sub>3</sub> ) <sub>2</sub> ]                               | 3D framework      | [MoO <sub>3</sub> (IO <sub>3</sub> )] <sup>3-</sup>                               | 3.32 eV                           | 6.5 × 10 <sup>-3</sup>       | 8.5 × KDP                | 22               |
| AMoO <sub>3</sub> (IO <sub>3</sub> ) (A = Rb, Cs)                                                    | 3D framework      | [MoO <sub>3</sub> (IO <sub>3</sub> )] <sup>-</sup>                                | 3.1 eV                            | 6.6 × 10 <sup>-3</sup>       | 400 × α-SiO <sub>2</sub> | 23               |

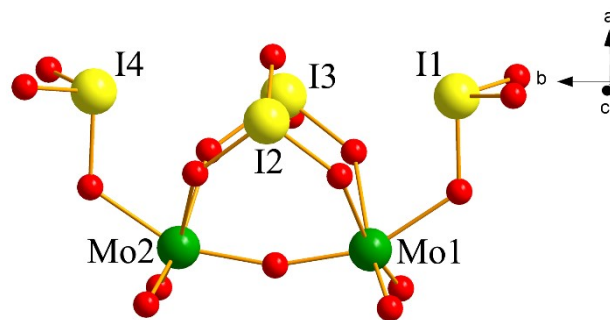

**Fig. S1** boat-shaped  $[\text{Mo}_2\text{O}_5(\text{IO}_3)_4]^{2-}$  polyanion.

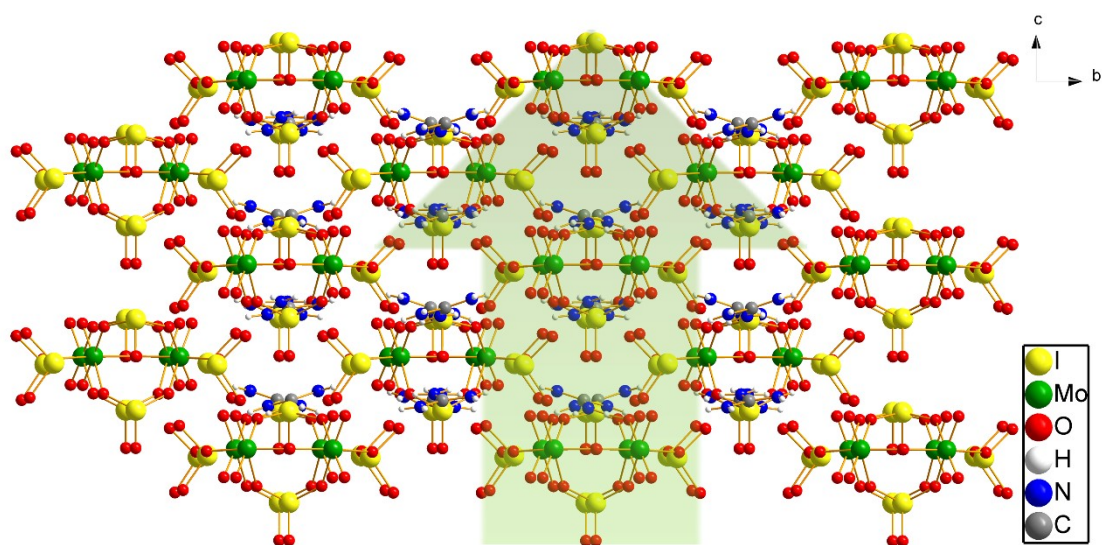

**Fig. S2** Illustration of the 3D structure of GMIO viewed down the a-axis. Green arrows indicate the direction of the dipole moments.

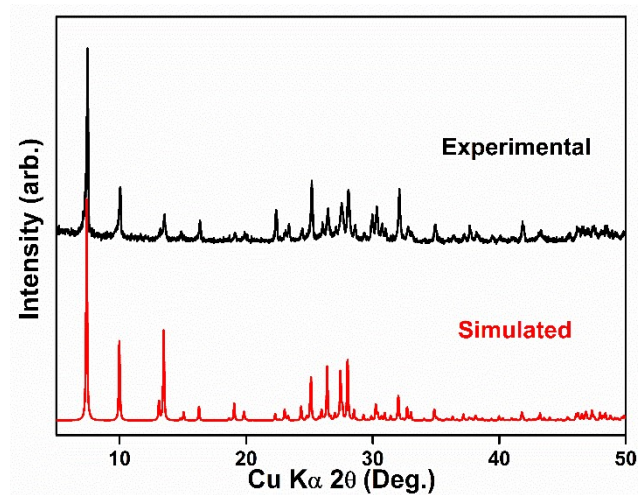

**Fig. S3** Experimental and calculated XRD patterns for GMIO.

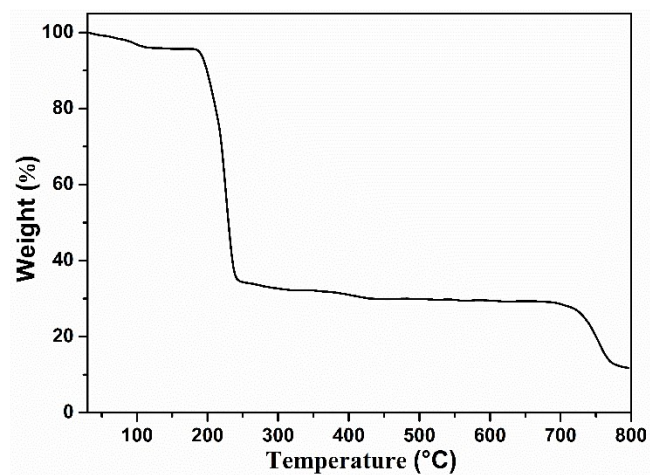

**Fig. S4** TGA analysis of GMIO under N<sub>2</sub> atmosphere.

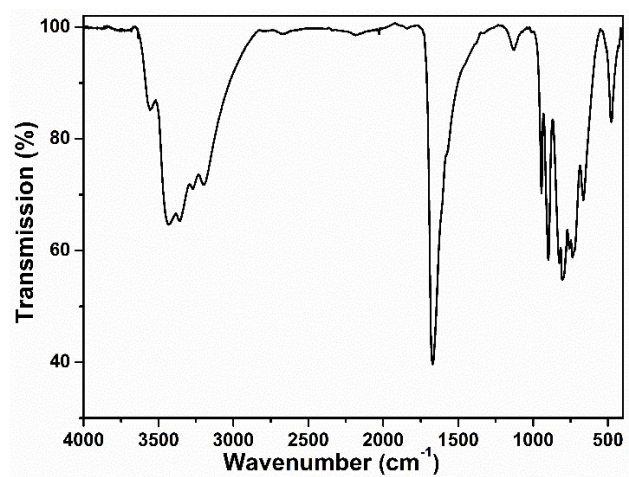

**Fig. S5** The IR spectrum of GMIO.

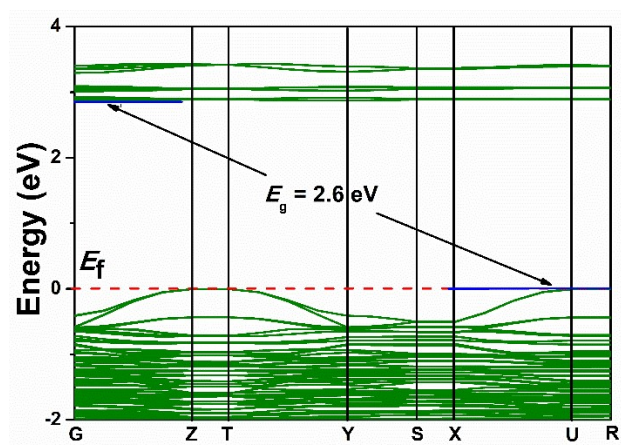

**Fig. S6** Calculated band structures for GMIO.

## References

1. G. M. Sheldrick, *Acta Crystallogr A*, 2008, **64**, 112-122.
2. G. M. Sheldrick, *University of Göttingen, Germany*, 1997.
3. A. L. Spek, *J. Appl. Cryst.*, 2003, **36**, 7-13.
4. P. Kubelka and F. Z. Munk, *Tech. Phys.*, 1931, **12**, 593-601.
5. J. Tauc, *Mater. Res. Bull.*, 1970, **5**, 721-729.
6. S. K. Kurtz and T. T. Perry, *J. Appl. Phys.*, 1968, **39**, 3798-3813.
7. M. D. Segall, P. J. D. Lindan, M. J. Probert, C. J. Pickard, P. J. Hasnip, S. J. Clark and M. C. Payne, *Journal of Physics: Condensed Matter*, 2002, **14**, 2717-2744.
8. J. P. Perdew, K. Burke and M. Ernzerhof, *Phys. Rev. Lett.*, 1996, **77**, 3865-3868.
9. K. Kobayashi, *Computational Materials Science*, 1999, **14**, 72-76.
10. D. Vanderbilt, *Physical Review B*, 1990, **41**, 7892-7895.
11. G. Kresse, *VASP*, 5.3.5; <http://cms.mpi.univie.ac.at/vasp/vasp/vasp.html>, **2014**.
12. S. N. Rashkeev, W. R. L. Lambrecht and B. Segall, *Phys. Rev. B*, **1998**, **57**, 3905.
13. B. Champagne and D. M. Bishop, *Adv. Chem. Phys.*, **2003**, **126**, 41-92.
14. A. H. Reshak, S. Auluck and I. V. Kityk, *Phys. Rev. B*, 2007, **75**, 245120.
15. Y. L. Hu, X. X. Jiang, C. Wu, Z. P. Huang, Z. S. Lin, M. G. Humphrey and C. Zhang, *Chem. Mater.*, 2021, **33**, 5700-5708.
16. Q. M. Huang, C. L. Hu, B. P. Yang, R. L. Tang, J. Chen, Z. Fang, B. X. Li and J. G. Mao, *Chem. Mater.*, 2020, **32**, 6780-6787.
17. T. C. Shehee, R. E. Sykora, M. K. Kang, P. S. Halasyamani and T. E. Albrecht-Schmitt, *Inorg. Chem.*, 2003, **42**, 457-462.
18. X. A. Chen, X. A. Chang, H. G. Zang, Q. Wang and W. Q. Xiao, *J. Alloys Compd.*, 2005, **396**, 255-259.
19. L. Zhang, X. Chen, X. Chang, H. Zang and W. Xiao, *Journal of Synthetic Crystals* 2005, **34**, 812-816.
20. A. H. Reshak and S. Auluck, *J. Alloys Compd.*, 2016, **660**, 32-38.
21. X. A. Chen, L. Zhang, X. N. Chang, H. P. Xue, H. G. Zang, W. Q. Xiao, X. M. Song and H. Yan, *J. Alloys Compd.*, 2007, **428**, 54-58.
22. Y. L. Hu, X. X. Jiang, C. Wu, Z. P. Huang, Z. S. Lin, M. G. Humphrey and C. Zhang, *Chem. Mater.*, 2021, **33**, 5700-5708.
23. R. E. Sykora, K. M. Ok, P. S. Halasyamani and T. E. Albrecht-Schmitt, *J. Am. Chem. Soc.*, 2002, **124**, 1951-1957.
